## Expression of Concern

# Expression of Concern: *In vivo* and *in vitro* effects of hyperplasia suppressor gene on the proliferation and apoptosis of lung adenocarcinoma A549 cells

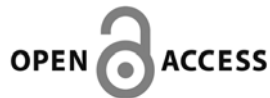

The Editorial Office has been made aware of potential issues surrounding the scientific validity of this paper, hence has issued an expression of concern to notify readers whilst the Editorial Office investigates.

Version of Record published:  
19 April 2021
